# Supplementary material for: A new 1,2,3-triazole-decorated imino-phenol: selective sensing of Zn2+, Cu2+ and picric acid under different experimental conditions
Source: Royal Society of Chemistry journal article supplement (doi:10.1039/d1nj01853a), 2021-01-01
Supplement: d1nj01853a1.pdf [file d1nj01853a1.pdf]

## Supporting Information

### A new 1,2,3-triazole-decorated imino-phenol: Selective sensing of Zn<sup>2+</sup>, Cu<sup>2+</sup> and picric acid under different experimental conditions

Sumit Ghosh, Nabajyoti Baildya and Kumares Ghosh\*

Department of Chemistry, University of Kalyani, Kalyani-741235, India.  
Email: ghosh\_k2003@yahoo.co.in; kumareschem18@klyuniv.ac.in

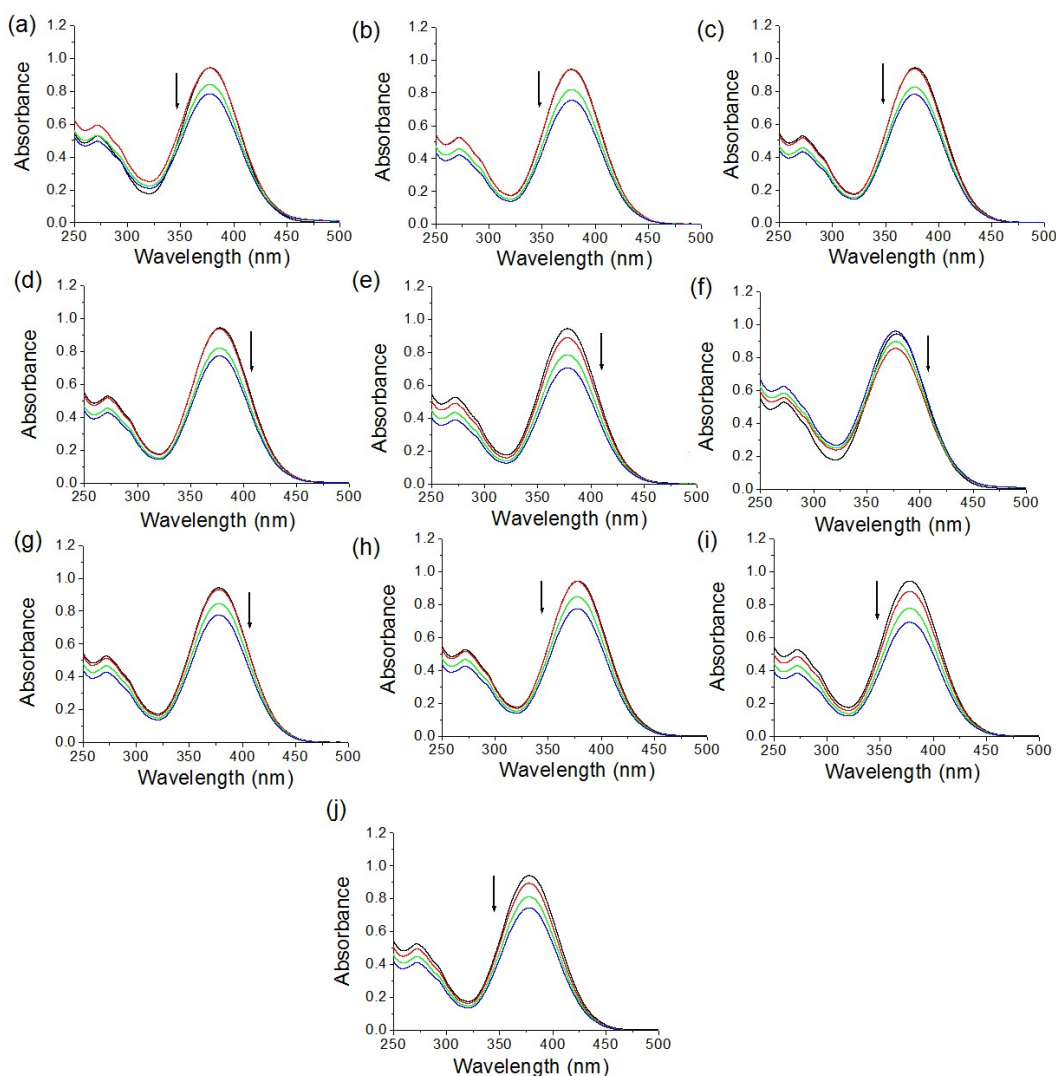

**Figure S1.** Change in absorbance of **1** ( $c = 2.5 \times 10^{-5}$  M) in CH<sub>3</sub>CN-H<sub>2</sub>O (3:1, v/v, 10 mM HEPES, pH = 6.8, containing 1% DMSO) upon addition of 3 equiv. amounts of (a) Ag<sup>+</sup>, (b) Al<sup>3+</sup>, (c) Ca<sup>2+</sup>, (d) Cd<sup>2+</sup>, (e) Co<sup>2+</sup>, (f) Fe<sup>2+</sup>, (g) Fe<sup>3+</sup>, (h), Hg<sup>2+</sup>, (i) Ni<sup>2+</sup> and (j) Pb<sup>2+</sup> [concentration of metal ions were 1 x 10<sup>-3</sup> M; all metal ions were used as their perchlorate salts].

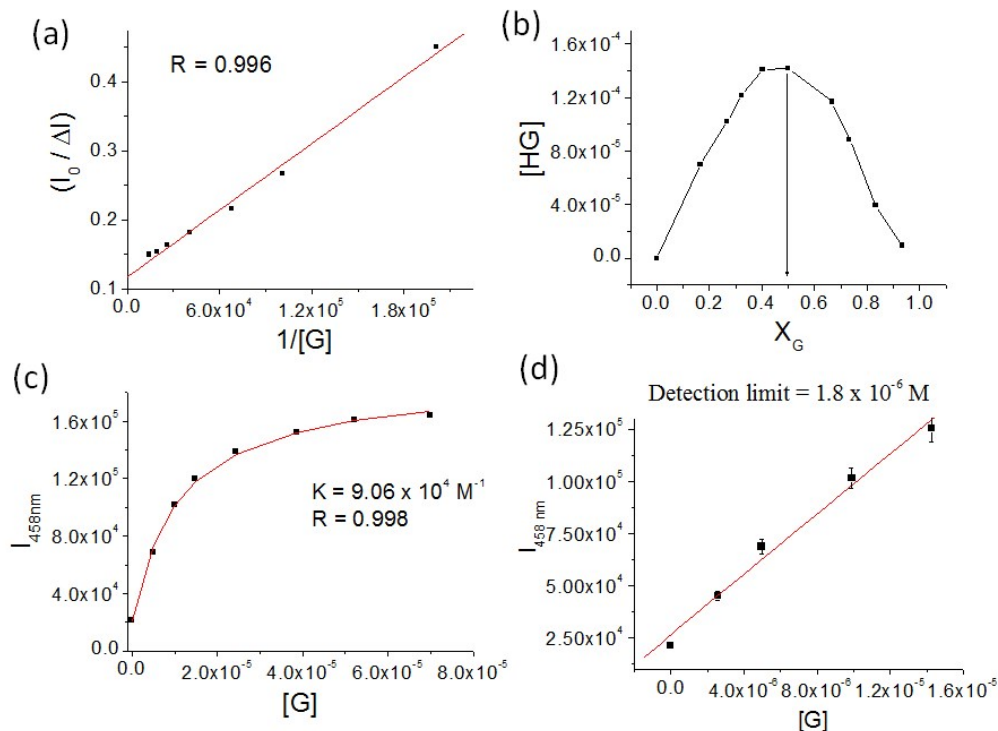

**Figure S2.** (a) Benesi-Hildebrand plot for **1** ( $c = 2.5 \times 10^{-5}$  M) with  $\text{Zn}^{2+}$ ; (b) Fluorescence ( $\lambda_{\text{ex}} = 380$  nm) Job plot at 458 nm for **1** with  $\text{Zn}^{2+}$  ions in  $\text{CH}_3\text{CN-H}_2\text{O}$  (3:1, v/v, 10 mM HEPES, pH = 6.8, containing 1% DMSO) where  $[\text{H}] = [\text{G}] = 2.5 \times 10^{-5}$  M; (c) Non linear binding constant curve for **1** ( $c = 2.5 \times 10^{-5}$  M) with  $\text{Zn}^{2+}$  ( $c = 1.0 \times 10^{-3}$  M) and (d) Detection limit for **1** ( $c = 2.5 \times 10^{-5}$  M) with  $\text{Zn}^{2+}$  ( $[\text{Zn}^{2+}] = 1 \times 10^{-3}$  M) at 458 nm in  $\text{CH}_3\text{CN-H}_2\text{O}$  (3:1, v/v, 10 mM HEPES, pH = 6.8, containing 1% DMSO) from emission titration.

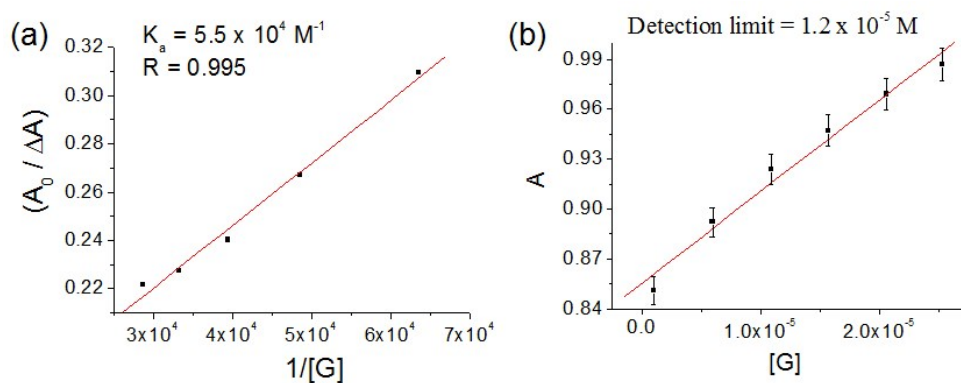

**Figure S3.** (a) Binding constant curve and (b) detection limit for compound **1** ( $c = 1.7 \times 10^{-5}$  M) with  $\text{Zn}^{2+}$  ( $[\text{Zn}^{2+}] = 1 \times 10^{-3}$  M) at 390 nm in  $\text{CH}_3\text{CN-H}_2\text{O}$  (3:1, v/v, 10 mM HEPES, pH = 6.8, containing 1% DMSO) from absorbance study.

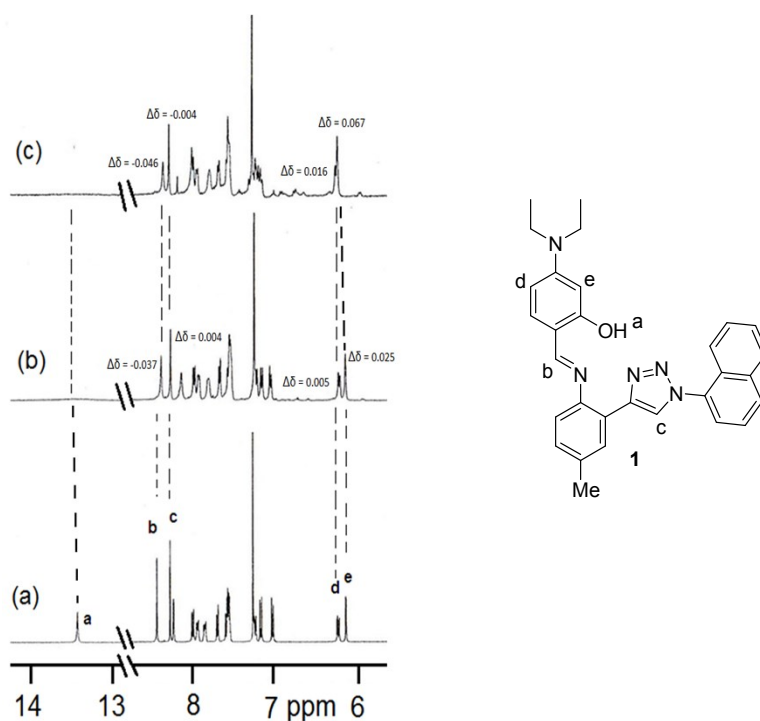

**Figure S4.** Partial  $^1\text{H}$  NMR ( $\text{CDCl}_3$ , 400 MHz) of (a) **1** ( $c = 0.004 \text{ M}$ ), (b) **1** with 1 equiv. amount of  $\text{Zn}^{2+}$  and (c) **1** with 2 equiv. amount of  $\text{Zn}^{2+}$ .

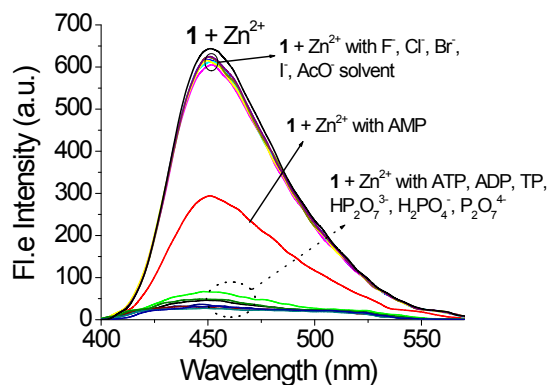

**Figure S5.** Change in emission of the zinc-ensemble of **1** ( $c = 2.5 \times 10^{-5} \text{ M}$ ) upon gradual addition 5 equiv. amounts of different anions ( $c = 1 \times 10^{-3} \text{ M}$ ) in  $\text{CH}_3\text{CN}/\text{H}_2\text{O}$  (3: 1, v/v, pH = 6.8, 10 mM HEPES buffer, containing 1% DMSO).

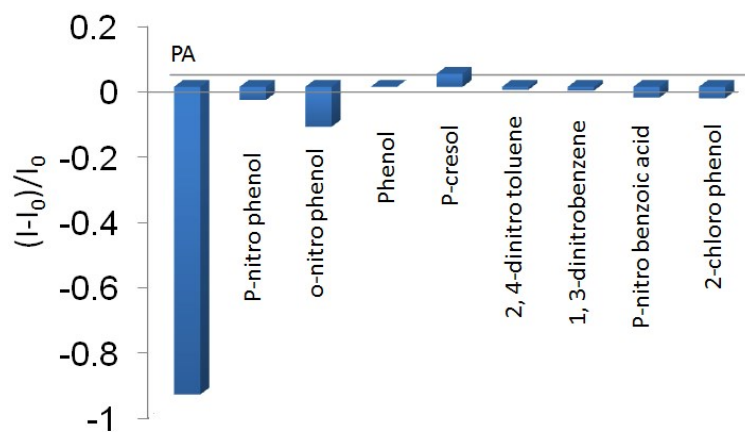

**Figure S6.** Change in fluorescence ratio of **1**.Zn<sup>2+</sup> ( $c = 2.5 \times 10^{-5}$  M) at 458 nm in the presence of 5 equiv. amounts of different nitroaromatics in CH<sub>3</sub>CN/H<sub>2</sub>O (3: 1, v/v, pH = 6.8, 10 mM HEPES buffer, containing 1% DMSO).

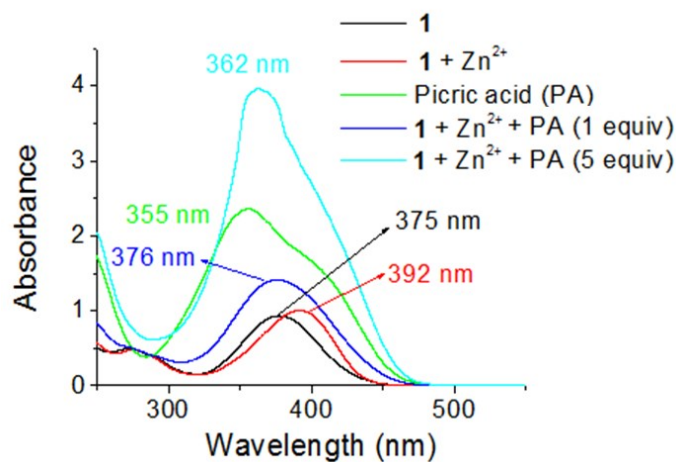

**Figure S7.** Change in emission of the ensemble **1**.Zn<sup>2+</sup> [prepared by mixing **1** ( $c = 2.5 \times 10^{-5}$  M) with 3 equiv. amounts of Zn<sup>2+</sup> ( $c = 1 \times 10^{-3}$  M)] upon addition of picric acid (PA) ( $c = 1 \times 10^{-3}$  M) in CH<sub>3</sub>CN/H<sub>2</sub>O (3 : 1, v/v, pH = 6.8, 10 mM HEPES buffer, containing 1 % DMSO).

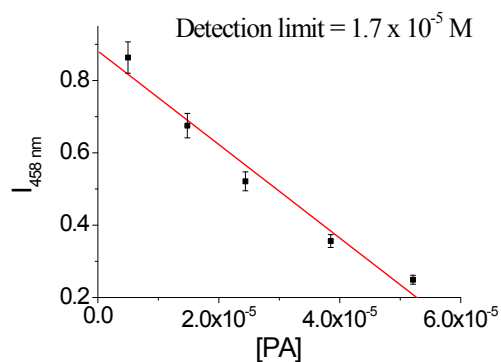

**Figure S8.** Detection limits for **1-Zn<sup>2+</sup>** ensemble ( $c = 2.5 \times 10^{-5}$  M) with picric acid (PA) ( $[PA] = 1 \times 10^{-3}$  M) at 458 nm in CH<sub>3</sub>CN-H<sub>2</sub>O (3:1, v/v, 10 mM HEPES, pH = 6.8, containing 1% DMSO) from emission titration.

**Table S1:** Simulated absorption wavelengths ( $\lambda_{max}$  in nm), oscillator strengths ( $f$ ), and the composition of the corresponding electronic transitions (H = HOMO; L = LUMO) calculated using B3LYP/6-31g(d) level of theory

| Compound                                                        | $\lambda_{max}$           | $f$  | $\epsilon$<br>( $10^4$ ) | Main compositions (contribution) |
|-----------------------------------------------------------------|---------------------------|------|--------------------------|----------------------------------|
| <b>1</b> in CH <sub>3</sub> CN-H <sub>2</sub> O                 | 356<br>(376) <sup>a</sup> | 1.13 | 2.81                     | H→L+1 (94%)                      |
|                                                                 | 294                       | 0.20 | 3.39                     | H-3→L (87%)                      |
| <b>1-Zn<sup>2+</sup></b> in CH <sub>3</sub> CN-H <sub>2</sub> O | 380<br>(392) <sup>a</sup> | 1.10 | 2.63                     | H→L (95%)                        |
|                                                                 | 306                       | 0.21 | 3.27                     | H-1→L+1 (84%)                    |

\*a indicates the experimental values

**Table S2 :** Reported structures for Zn<sup>2+</sup> sensing in solution phase.

| Entry | Structure of sensor | solvent            | Detection limit | Interference from other metal ions | Ref. |
|-------|---------------------|--------------------|-----------------|------------------------------------|------|
| 1     |                     | CH <sub>3</sub> CN | -               | Cd <sup>2+</sup>                   | 1    |

|   |                                                                                     |                                                    |                          |                                                        |   |
|---|-------------------------------------------------------------------------------------|----------------------------------------------------|--------------------------|--------------------------------------------------------|---|
| 2 | 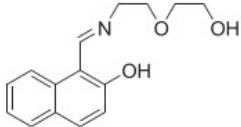   | EtOH:H <sub>2</sub> O (9:1, v/v)                   | 1 x 10 <sup>-8</sup> M   | -                                                      | 2 |
| 3 |    | THF                                                | 3.5 x 10 <sup>-9</sup> M | -                                                      | 3 |
| 4 |    | 50 mM PIPES, 100 mM KCl (pH 7)                     | ~ 5 x 10 <sup>-6</sup> M | -                                                      | 4 |
| 5 |    | CH <sub>3</sub> CN: DMF (9:1, v/v)                 | 1 x 10 <sup>-7</sup> M   | Fe <sup>3+</sup> , Cu <sup>2+</sup> , Ni <sup>2+</sup> | 5 |
| 6 |    | CH <sub>3</sub> CN: DMF (9:1, v/v)                 | -                        | Cd <sup>2+</sup>                                       | 5 |
| 7 |  | buffer solution (10 mM, Tris-HCl, distilled water) | 2.4x10 <sup>-6</sup> M   | Cd <sup>2+</sup>                                       | 6 |
| 8 |  | buffer solution (10 mM, Tris-HCl, distilled water) | 1 x 10 <sup>-6</sup> M   | Cd <sup>2+</sup>                                       | 6 |
| 9 |  | CH <sub>3</sub> CN: DMF (1:1, v/v)                 | 5 x 10 <sup>-8</sup> M   | Cu <sup>2+</sup> , Fe <sup>3+</sup>                    | 7 |

|    |                                                                                     |                                                                                |                                 |                                                           |    |
|----|-------------------------------------------------------------------------------------|--------------------------------------------------------------------------------|---------------------------------|-----------------------------------------------------------|----|
| 10 | 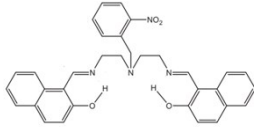   | <b>CH<sub>3</sub>CN:<br/>DMF<br/>(1:1,<br/>v/v)</b>                            | <b>1 × 10<sup>-7</sup> M</b>    | -                                                         | 8  |
| 11 |    | 50 mM<br>PIPES<br>buffer,<br>100 mM<br>KCl, pH<br>7                            | <b>1 × 10<sup>-6</sup> M</b>    | Hg <sup>2+</sup> , Pb <sup>2+</sup> ,<br>Cd <sup>2+</sup> | 9  |
| 12 |    | buffer<br>solution<br>(10<br>mM,<br>Tris-<br>HCl, pH<br>7.5)                   | -                               | -                                                         | 10 |
| 13 |   | EtOH:H <sub>2</sub><br>O (95:5,<br>v/v)                                        | <b>4.89 × 10<sup>-8</sup> M</b> | Cu <sup>2+</sup>                                          | 11 |
| 14 |  | MeOH                                                                           | <b>60 ppb</b>                   | Cu <sup>2+</sup>                                          | 12 |
| 15 |  | DMSO/<br>H <sub>2</sub> O,<br>v/v, 1:9;<br>5 mM,<br>HEPES<br>buffer:<br>pH 7.0 | <b>3.1 × 10<sup>-4</sup> M</b>  | -                                                         | 13 |
| 16 |  | EtOH:H <sub>2</sub><br>O (1:1,<br>v/v)                                         | <b>2.9 × 10<sup>-8</sup> M</b>  | Cu <sup>2+</sup> , Fe <sup>3+</sup>                       | 14 |

|    |                                                                                                                                                                                                                 |                                                                  |                          |   |    |
|----|-----------------------------------------------------------------------------------------------------------------------------------------------------------------------------------------------------------------|------------------------------------------------------------------|--------------------------|---|----|
| 17 | 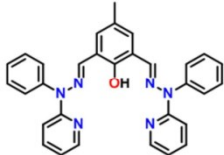                                                                                                                               | DMSO:<br>H <sub>2</sub> O<br>(1:1,<br>v/v)                       | -                        | - | 15 |
| 18 |                                                                                                                                | bis-tris<br>buffer<br>solution<br>(pH 7.0)<br>containing<br>DMSO | $9 \times 10^{-4}$ M     | - | 16 |
| 19 |                                                                                                                                | DMSO                                                             | 27.80 nM                 | - | 17 |
| 20 | <br>R = tert-butyl                                                                                                            | MeOH                                                             | 192 ppb                  | - | 18 |
| 21 | <br>R      R <sub>1</sub> R <sub>2</sub> R <sub>3</sub><br>t-butyl   CH <sub>3</sub> CH <sub>2</sub> OH   CH <sub>2</sub> OH | MeOH                                                             | 174 ppb                  | - | 19 |
| 22 |                                                                                                                              | MeOH:<br>H <sub>2</sub> O<br>(2:1,<br>v/v)                       | $0.068 \times 10^{-6}$ M | - | 20 |



|    |                                                                                                         |                                                                             |                           |                                                           |    |
|----|---------------------------------------------------------------------------------------------------------|-----------------------------------------------------------------------------|---------------------------|-----------------------------------------------------------|----|
| 23 | 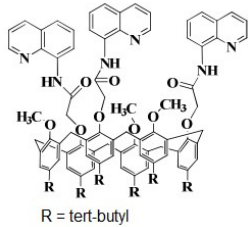 <p>R = tert-butyl</p> | MeOH                                                                        | -                         | Cu <sup>2+</sup>                                          | 21 |
| 24 |                        | CH <sub>3</sub> CN/<br>HEPES<br>(10<br>mM, pH<br>= 7.4) =<br>1 : 1<br>(v/v) | 2.2 × 10 <sup>-6</sup> M  | Fe <sup>3+</sup> , Al <sup>3+</sup>                       | 22 |
| 25 |                        | MeOH                                                                        | 183 ppb                   | Fe <sup>2+</sup> , Cu <sup>2+</sup> ,<br>Hg <sup>2+</sup> | 23 |
| 26 |                       | 10 mM<br>HEPES<br>buffer-<br>CH <sub>3</sub> OH<br>(99 : 1,<br>v/v)         | 1.1 × 10 <sup>-6</sup> M  | Co <sup>2+</sup> , Cu <sup>2+</sup>                       | 24 |
| 27 |                      | DMSO                                                                        | 0.29 × 10 <sup>-6</sup> M | -                                                         | 25 |
| 28 |                      | DMF:H <sub>2</sub><br>O (9:1,<br>v/v)                                       | 300nM                     | Cu <sup>2+</sup> , Hg <sup>2+</sup>                       | 26 |
| 29 |                      | DIOX:H <sub>2</sub><br>O (13:7,<br>v/v)                                     | 63nM                      | -                                                         | 26 |

|    |                                                                                                                        |                                            |                           |                                                           |    |
|----|------------------------------------------------------------------------------------------------------------------------|--------------------------------------------|---------------------------|-----------------------------------------------------------|----|
| 30 | 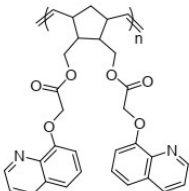                                      | CH <sub>3</sub> CN                         | 2.04 × 10 <sup>-7</sup> M | Cd <sup>2+</sup>                                          | 27 |
| 31 |                                       | CH <sub>3</sub> CN                         | 6.43 nM                   | Hg <sup>2+</sup>                                          | 28 |
| 32 | <br>R = <i>tert</i> -butyl            | MeOH                                       | 6.9 × 10 <sup>-7</sup> M  | Ni <sup>2+</sup> , Cu <sup>2+</sup> ,<br>Fe <sup>2+</sup> | 29 |
| 33 | <br>n = 1<br>R = <i>tert</i> -butyl  | MeOH:<br>H <sub>2</sub> O<br>(2:1,<br>v/v) | 31 ppb                    | -                                                         | 30 |
| 34 | <br>n = 2<br>R = <i>tert</i> -butyl | MeOH:<br>H <sub>2</sub> O<br>(2:1,<br>v/v) | 112 ppb                   | -                                                         | 30 |
| 35 |                                     | DMF                                        | 1.5 × 10 <sup>-6</sup> M  | Al <sup>3+</sup>                                          | 31 |

|           |                                                                                   |                                                                                                                                      |                           |                                                        |    |
|-----------|-----------------------------------------------------------------------------------|--------------------------------------------------------------------------------------------------------------------------------------|---------------------------|--------------------------------------------------------|----|
| 36        | 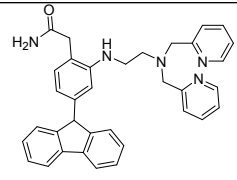 | HEPES buffer (10 mM, pH 7.4)                                                                                                         | -                         | Cd <sup>2+</sup> , Co <sup>2+</sup> , Cu <sup>2+</sup> | 32 |
| 37        |  | MeOH                                                                                                                                 | 1.74 × 10 <sup>-6</sup> M | Al <sup>3+</sup>                                       | 33 |
| 38        |  | HEPES buffer                                                                                                                         | -                         | Hg <sup>2+</sup> , Cd <sup>2+</sup>                    | 34 |
| This work |  | <b>CH<sub>3</sub>CN:</b><br><b>H<sub>2</sub>O</b><br><b>(3:1,</b><br><b>v/v</b> pH = 6.8,<br>10 mM HEPES buffer, containing 1% DMSO) | 1.8 × 10 <sup>-6</sup> M  | Cu <sup>2+</sup>                                       | -  |

<sup>1</sup>H NMR (CDCl<sub>3</sub>, 400 MHz) of 1

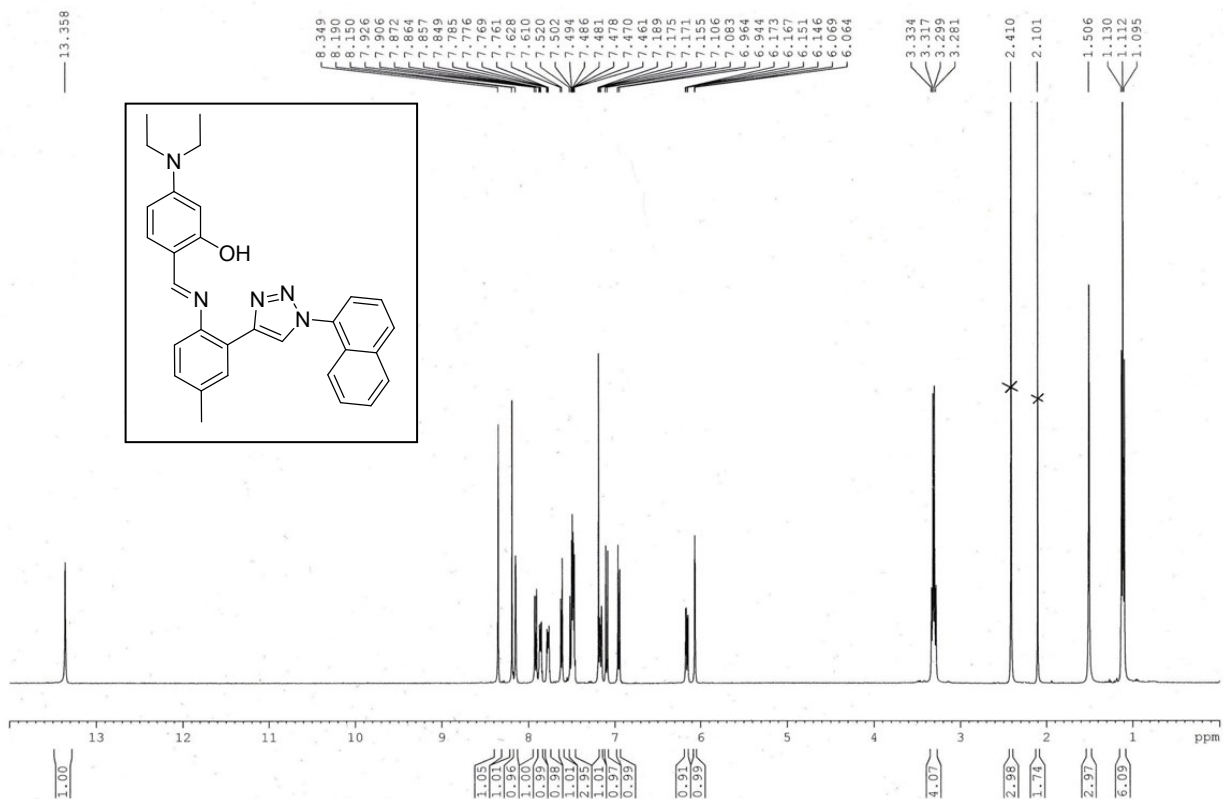

**<sup>13</sup>C NMR (CDCl<sub>3</sub>, 100 MHz) of 1**

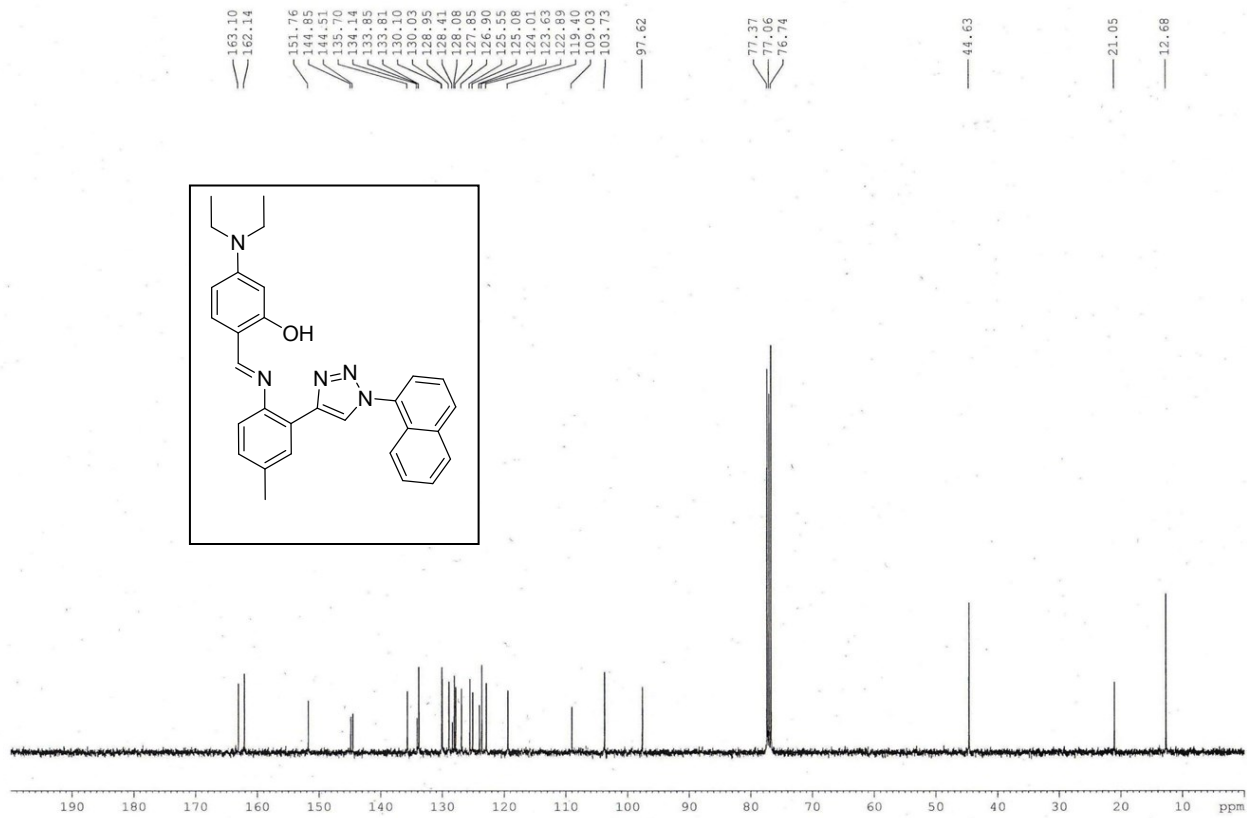

Mass (CDCl<sub>3</sub>, 100 MHz) of 1

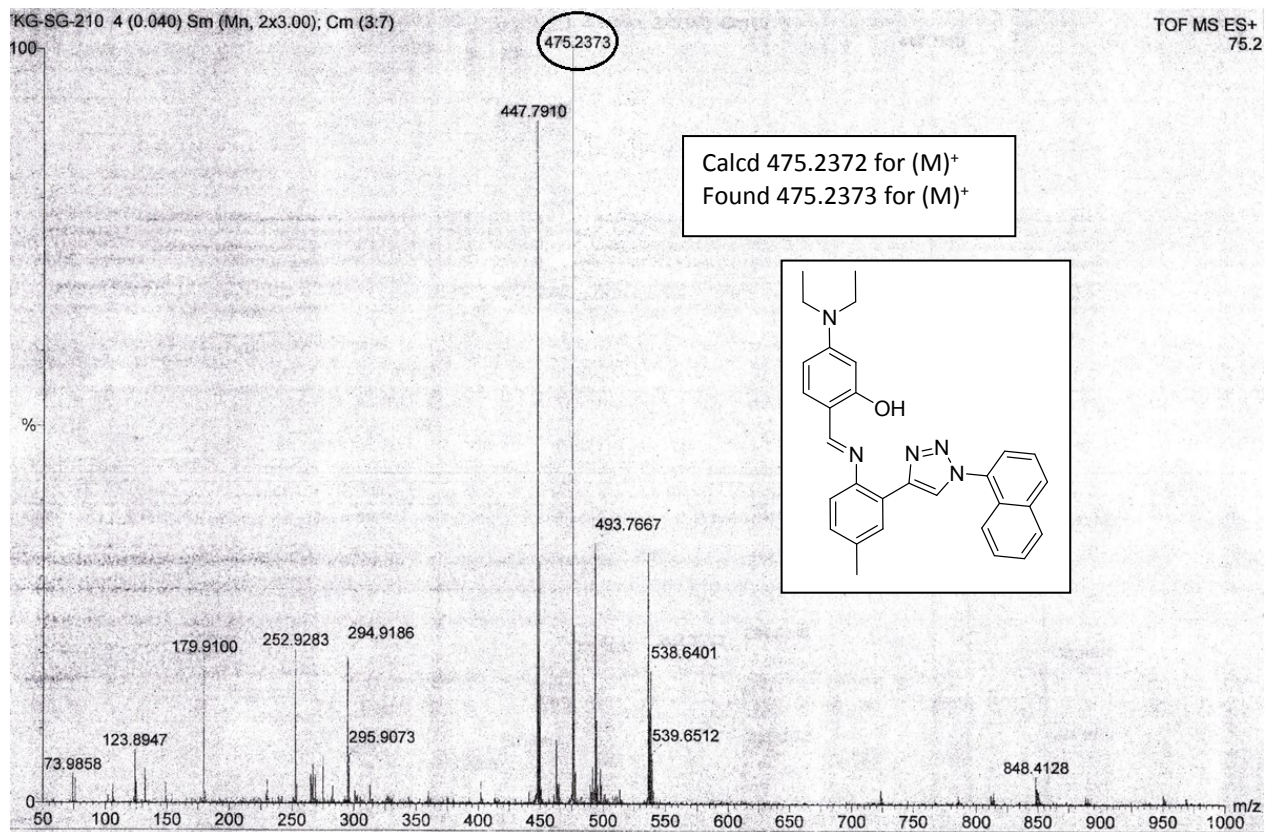

**<sup>1</sup>H NMR (CDCl<sub>3</sub>, 400 MHz) of 2**

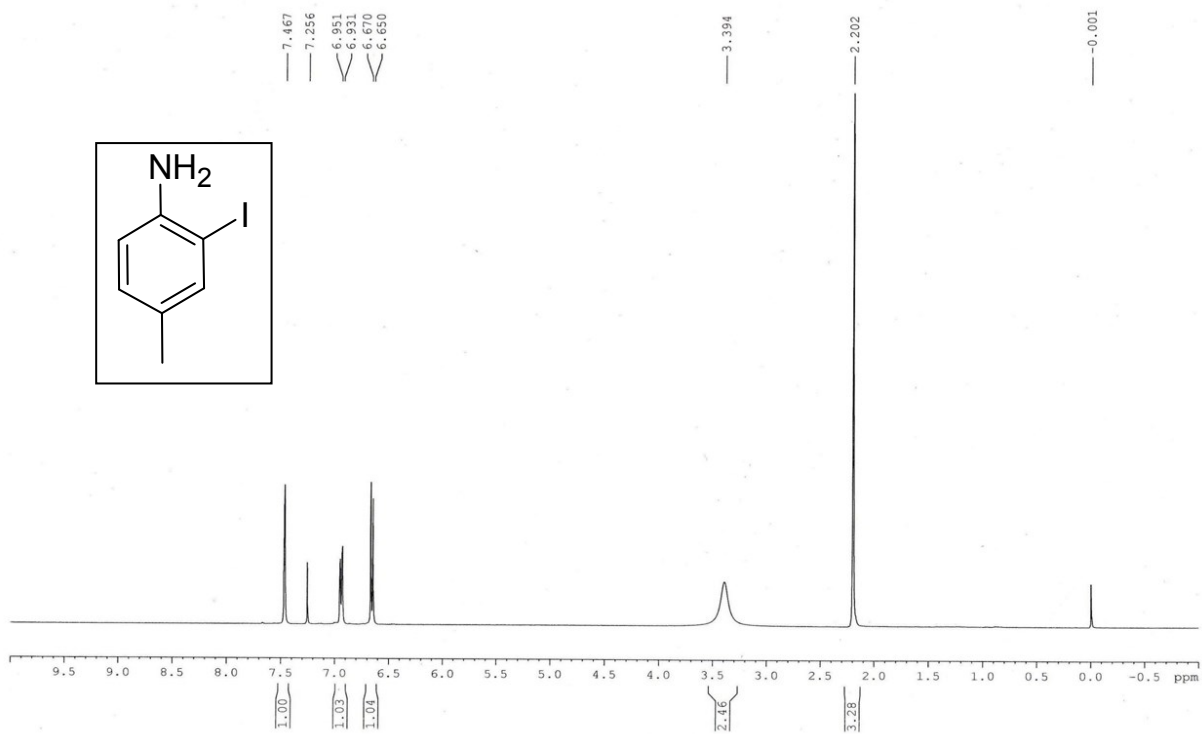

**<sup>1</sup>H NMR (CDCl<sub>3</sub>, 400 MHz) of 3**

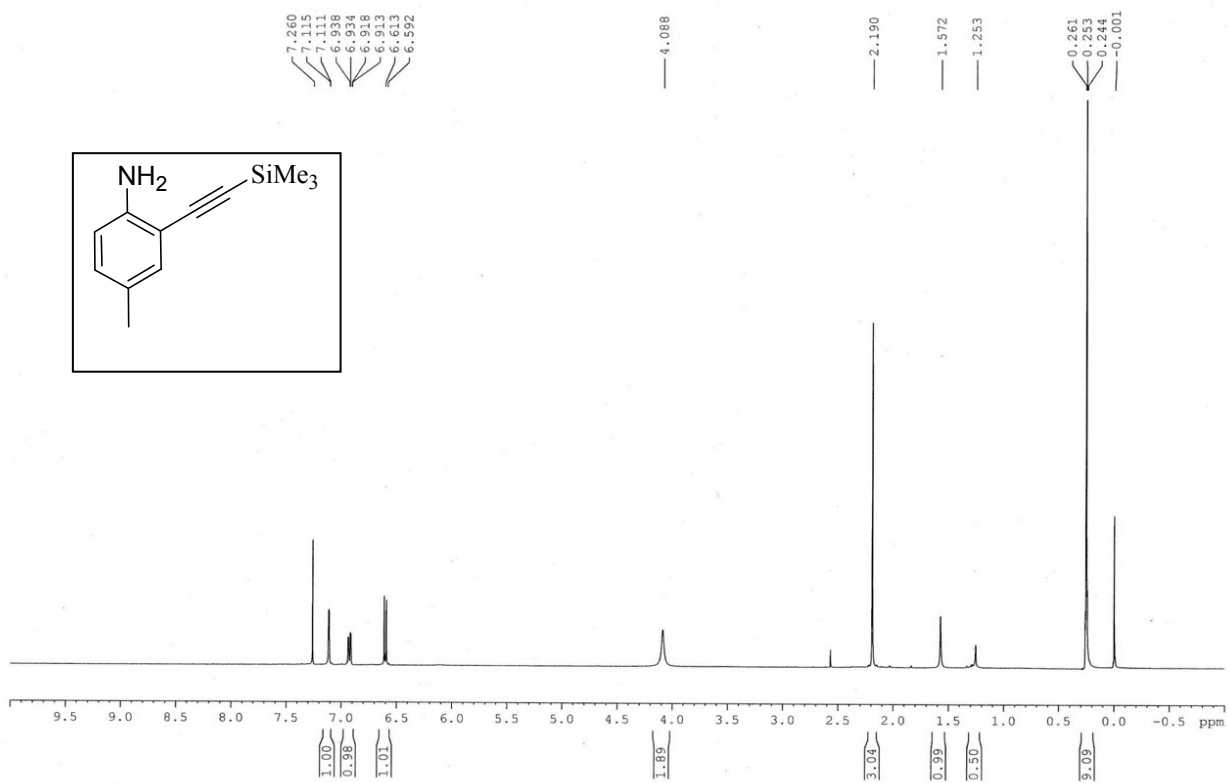



<sup>1</sup>H NMR (CDCl<sub>3</sub>, 400 MHz) of 6

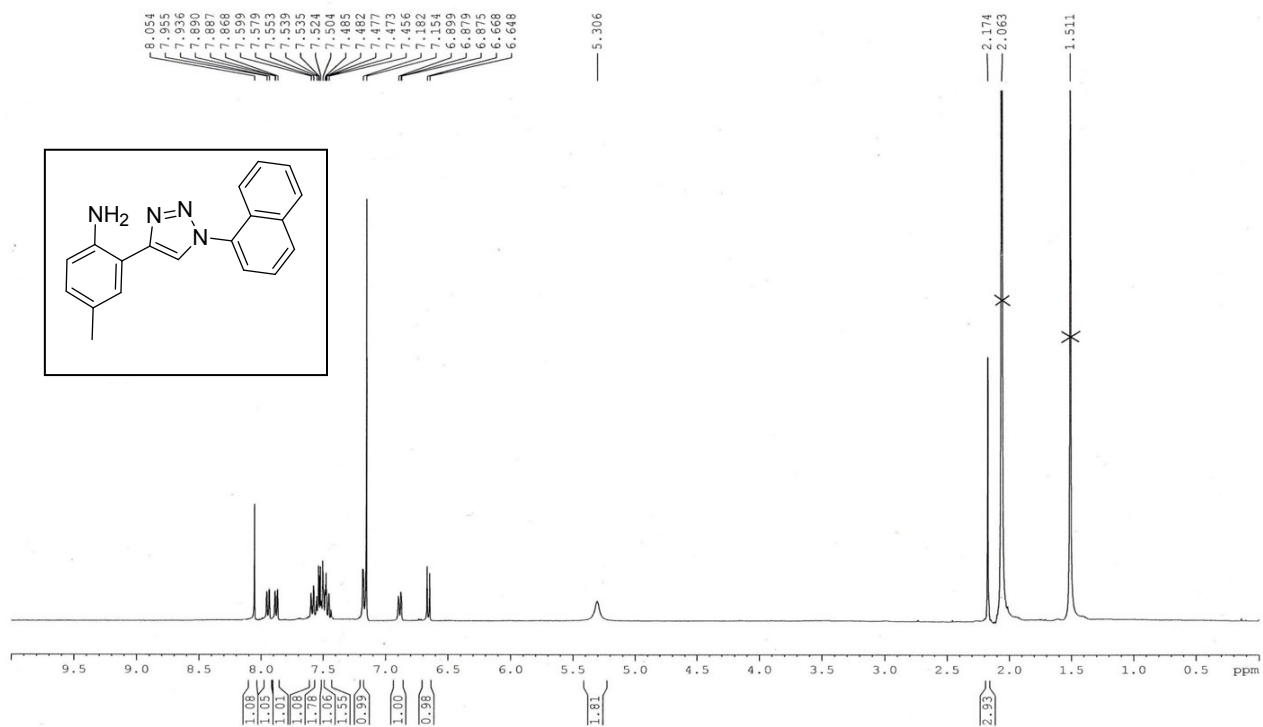

**<sup>13</sup>C NMR (CDCl<sub>3</sub>, 100 MHz) of 6**

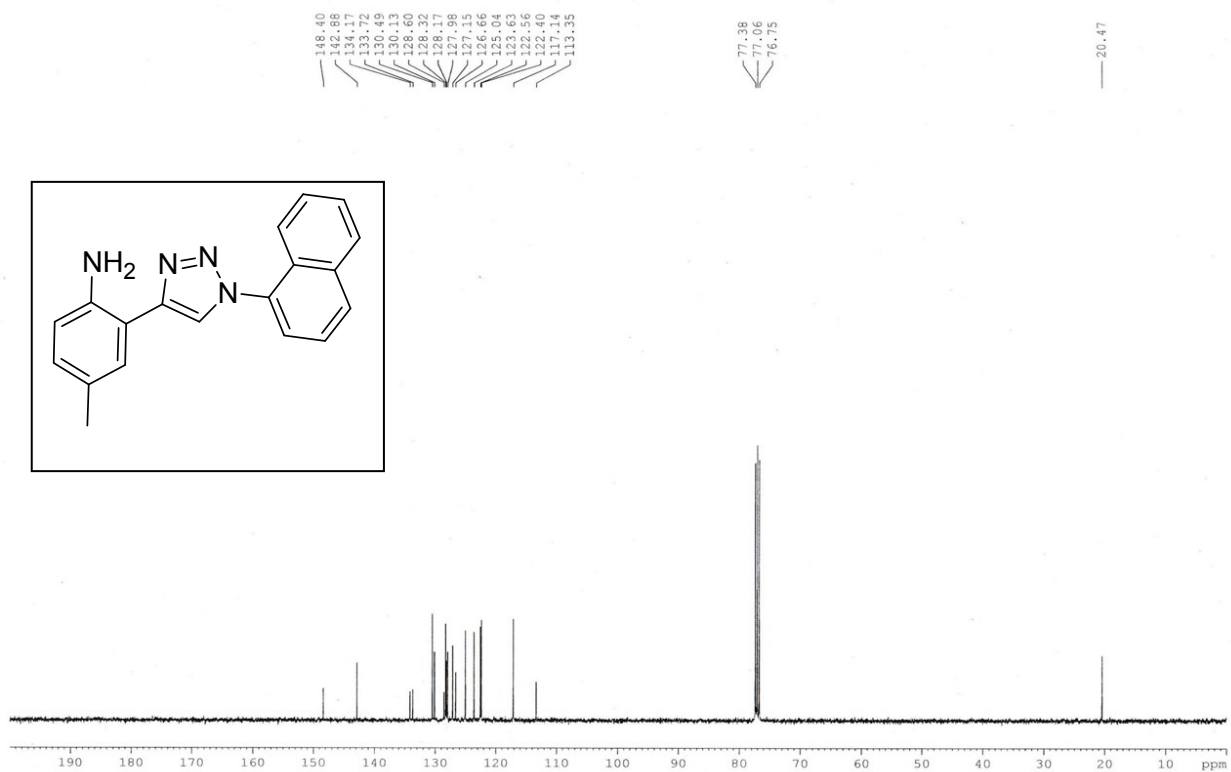

**Reference**

1. S. Y. Park, J. H. Yoon, C. S. Hong, R. Souane, J. S. Kim, S. E. Matthews and J. Vicens, *J. Org. Chem.*, 2008, **73**, 8212.
2. H. Y. Lin, T. Y. Chen, C. K. Liu and A. T. Wu, *Luminescence*, 2016, **31**, 236.
3. V. Bhalla, Roopa and M. Kumar, *Dalton Trans.*, 2013, **42**, 975.
4. C. J. Chang, E. M. Nolan, J. Jaworski, S. C. Burdette, M. Sheng and S. J. Lippard, *Chemistry & Biology*, 2004, **11**, 203.
5. R. Azadbakht, H. Keypour, H. A. Rudbari, A. H. Mohammad and Z. S. Menati, *J. Lumin.*, 2012, **132**, 1860.
6. L. Li, F. Liu and H. W. Li, *Spectrochim. Acta A*, 2011, **79**, 1688.
7. R. Azadbakht, M. Parviz, E. Tamari, H. Keypour and R. Golbedaghi, *Spectrochim. Acta A*, 2011, **80**, 200.

8. R. Azadbakht and H. Keypour, *Spectrochim. Acta A*, 2012, **85**, 293.
9. N. C. Lim, L. Yao, H. C. Freakeb and C. Bruckner, *Bioorg. Med. Chem. Lett.*, 2003, **13**, 2251.
10. L. Li, Y. Q. Dang, H. W. Li, B. Wang and Y. Wu, *Tetrahedron Lett.*, 2010, **51**, 618.
11. W. H. Hsieh, C. F. Wan, D. J. Liao and A. T. Wu, *Tetrahedron Lett.*, 2012, **53**, 5848.
12. J. Dessingou, R. Joseph and C. P. Rao, *Tetrahedron Lett.*, 2005, **46**, 7967.
13. A. A. A. Aziz, *J. Braz. Chem. Soc.*, 2020, DOI: 10.21577/0103-5053.20200049.
14. Y. Yang, C. Ma, Y. Zhang, Q. Xue, J. ru, X. Liu and H. Guo, *Anal. Methods.*, 2018, **10**, 1833.
15. K. Ghosh, K. Mawai, S. nathani, P. Roy and U. P. singh, *Dalton Trans.*, 2018, **47**, 6421.
16. J. M. Jung, J. H. Kang, J. Han, H. Lee, M. H. Lim, K. T. Kim and Cheal Kim, *Sens. Actuators B Chem.*, 2018, **267**, 58.
17. S. Lohar, S. Pal, M. Mukherjee, A. Maji, N. Demitri and P. Chattopadhyay, *RSC Adv.*, 2017, **7**, 25528.
18. R. Joseph, J. P. Chinta and C. P. Rao, *J. Org. Chem.*, 2010, **75**, 3387.
19. R. K. Pathak, S. M. Ibrahim and C. P. Rao, *Tetrahedron Lett.*, 2009, **50**, 2730.
20. C. Sinha, C. Patra, A. K. Bhanja, A. Mahapatra, S. Mishra and K. D. Saha, *RSC Adv.*, 2016, **6**, 76505.
21. V.V. S. Mummidivarapu, S. Bandaru, D. S. Yarramala , K. Samanta, D. S. Mhatre and C. P. Rao, *Anal. Chem.*, 2015, **87**, 4988.
22. S. Y. Jiao, L. L. Peng, K. Li, Y. M. Xie, M. Z. Ao, X. Wang and X. Q. Yu, *Analyst*, 2013, **138**, 5762.
23. V. V. S. Mummidivarapu, K. Tabbasum, J. P. Chinta and C. P. Rao, *Dalton Trans.*, 2012, **41**, 1671.
24. K. B. Kim, H. Kim, E. J. Song, S. Kim, I. Nohb and C. Kim, *Dalton Trans.*, 2013, **42**, 16569.
25. D. Yun, J. B. Chae, H. So, H. Lee, K. T. Kim and C. Kim, *New J. Chem.*, 2020, **44**, 442.
26. J. wan, W. zhang, H. Guo, J. Liang, D. Huang and H. xiao, *J. Mater. Chem., C*, 2019, **7**, 2240.
27. P. Yao, Z. Liu, J. Ge, Y. Chen and Q. Cao, *Dalton Trans.*, 2015, **44**, 7470.
28. P. G. Sutariya, H. N. Soni, S. A. Gandhi and A. Pandya, *New J. Chem.*, 2019, **43**, 9855.
29. R. Joseph, J. P. Chinta, and C. P. Rao, *Inorg. Chem.*, 2011, **50**, 7050.
30. R. K. Pathak, V. K. Hinge, A. Rai, D. Panda and C. Pulla Rao, *Inorg. Chem.*, 2012, **51**, 4994.
31. Y. S. Kim, G. J. Park, J. J. Lee, S. Y. Lee, S. Y. Lee and C. Kim, *RSC Adv.*, 2015, **5**, 11229.
32. Q. c. Xu, X. f. Wang, G. w. Xing and Y. Zhang, *RSC Adv.*, 2013,**3**, 15834.
33. S. Dey, A. Maity, M. Shyamal, D. Das, S. Maity, P. K. Giri, N. Mudri, S. Samanta, P. Hazra and A. Misra, *Photochem. Photobiol. Sci.*, 2019, **18**, 2717.
34. S. Areti, S. Bandaru and C. P. Rao, *ACS Omega*, 2016, **1**, 626.
